# Supplementary material for: Investigation of the metastable structures of polyiodide in acetonitrile studied using global reaction route mapping and the reference interaction site model self-consistent field explicitly including constrained spatial electron density distribution
Source: Royal Society of Chemistry journal article supplement (doi:10.1039/d2cp02719d), 2022-01-01
Supplement: d2cp02719d1.pdf [file d2cp02719d1.pdf]

## Electronic Supplementary Information

# Investigation of the metastable structures of polyiodide in acetonitrile studied using global reaction route mapping and reference interaction site model self-consistent field explicitly including constrained spatial electron density distribution

Kayo Suda\* and Daisuke Yokogawa\*

Graduate School of Arts and Sciences, The University of Tokyo, 3-8-1 Komaba,  
Meguro-ku, Tokyo 153-8902, Japan.

E-mail: [suda.kayo@mail.u-tokyo.ac.jp](mailto:suda.kayo@mail.u-tokyo.ac.jp) (K.S.), [c-d.yokogawa@g.ecc.u-tokyo.ac.jp](mailto:c-d.yokogawa@g.ecc.u-tokyo.ac.jp) (D.Y.)

### Contents:

1. Cartesian coordinates of the obtained equilibrium structures (EQ) of  $I_7^-$  in gas phase (EQ0-EQ5) and acetonitrile (EQ0-EQ9) using GRRM and RISM-SCF-cSED.
2.  $\Delta\Delta G^{\text{sol}}$  of  $I_7^-$  of each structure in each phase.



## 1. Cartesian Coordinates (unit: Å)

Gas Phase

EQ0

|             |             |             |
|-------------|-------------|-------------|
| 0.28530201  | 0.27356431  | 0.27551079  |
| -0.06863821 | -0.06244230 | 3.44953311  |
| -0.43676483 | -0.40974738 | 6.25152332  |
| 3.45900246  | -0.06909175 | -0.07210661 |
| 6.26044157  | -0.42909934 | -0.43224316 |
| -0.06725166 | 3.44700032  | -0.06417919 |
| -0.43209135 | 6.24981615  | -0.40803825 |

EQ1

|             |             |             |
|-------------|-------------|-------------|
| -0.53392556 | 2.00357520  | 1.34026952  |
| 1.48796931  | -1.19842250 | 3.61231325  |
| 0.75195680  | -2.99261561 | 5.65270790  |
| 2.35876145  | 0.90666596  | 1.21465275  |
| 5.07717682  | -0.09307337 | 1.06656380  |
| -0.20253853 | 4.18632132  | -0.91686350 |
| 0.06059970  | 6.18754900  | -2.96964373 |

EQ2

|             |             |             |
|-------------|-------------|-------------|
| 2.25277581  | -0.03163547 | -1.21516679 |
| 1.28573504  | 1.28574552  | 1.28576816  |
| 0.31867663  | 2.60313753  | 3.78667800  |
| 4.61642531  | -1.89865571 | -0.15990706 |
| 6.74815614  | -3.59962472 | 0.70105030  |
| -2.04500551 | 4.47007415  | 2.73131605  |
| -4.17676341 | 6.17095871  | 1.87026135  |

EQ3

|             |             |             |
|-------------|-------------|-------------|
| -0.62883404 | -0.81933072 | -0.90794727 |
| 1.08054916  | -0.09151596 | 3.22290905  |
| 0.25674009  | -0.21799892 | 5.89512710  |
| 2.06701606  | 0.06146732  | 0.02285300  |
| 4.82504311  | 0.84448590  | 0.85320808  |
| 1.10261292  | 3.27120593  | -0.02380334 |

EQ4

|             |             |             |
|-------------|-------------|-------------|
| 3.16110715  | 1.73107487  | -0.85821963 |
| 1.04974176  | 2.47025814  | 0.97737826  |
| 0.71491798  | 4.27895053  | 4.99172526  |
| 3.93581596  | -1.35140399 | -0.22144027 |
| 4.72949084  | -4.03882186 | 0.21152829  |
| -1.22577262 | 3.36406580  | 2.91012572  |
| -3.36530108 | 2.54587651  | 0.98890237  |

EQ5

|             |             |             |
|-------------|-------------|-------------|
| -2.05438291 | 0.69566427  | 0.33635955  |
| 1.63728344  | 0.10737227  | 3.09313857  |
| 1.12101501  | -0.71969376 | 5.71454475  |
| 2.33816738  | 1.08401020  | -0.04228530 |
| 4.59545290  | -0.63155317 | -0.28888045 |
| -0.19962144 | 3.02226080  | 0.18011580  |
| 1.56208562  | 5.44193939  | 0.00700709  |

Acetonitrile

EQ0

|             |             |             |
|-------------|-------------|-------------|
| 0.04340934  | 0.04635128  | 0.04397486  |
| -0.04787752 | -0.04916052 | 3.23906820  |
| -0.12330266 | -0.13267544 | 6.06659589  |
| 3.23825236  | -0.04764124 | -0.04486490 |
| 6.06575996  | -0.12596359 | -0.12221744 |
| -0.04796786 | 3.24115019  | -0.05021595 |
| -0.12827364 | 6.06793931  | -0.13234065 |

EQ1

|             |             |             |
|-------------|-------------|-------------|
| -0.55741836 | 1.97346773  | 1.37780321  |
| 1.48810206  | -1.16553645 | 3.58063857  |
| 0.74803406  | -2.93883282 | 5.60294111  |
| 2.35052928  | 0.94995658  | 1.17550502  |
| 5.04171334  | -0.05726117 | 1.04621377  |
| -0.20064818 | 4.13298645  | -0.86593654 |
| 0.12968779  | 6.10521968  | -2.91716513 |

EQ2

|             |             |             |
|-------------|-------------|-------------|
| 2.10337235  | 0.08217785  | -1.30428399 |
| 1.28573103  | 1.28576789  | 1.28586420  |
| 0.46804792  | 2.48938368  | 3.87595411  |
| 4.44193588  | -1.74585895 | -0.15806326 |
| 6.53123992  | -3.38122682 | 0.85332159  |
| -1.87052652 | 4.31728039  | 2.72945849  |
| -3.95980058 | 5.95247596  | 1.71774885  |

EQ3

|             |             |             |
|-------------|-------------|-------------|
| -0.64928758 | -0.75627151 | -0.84145510 |
| 1.09126673  | -0.10759171 | 3.20739232  |
| 0.27666944  | -0.25485163 | 5.86155305  |
| 2.07837411  | 0.04554660  | 0.00534524  |
| 4.77324588  | 0.89667475  | 0.90611617  |
| 1.11079786  | 3.25603245  | -0.03746534 |
| 0.31893356  | 5.92046105  | -0.10148634 |

## EQ4

|            |            |            |
|------------|------------|------------|
| 3.19852654 | 1.92657731 | -1.0141582 |
| 1.13166376 | 2.49856229 | 0.86390931 |
| 0.85073804 | 4.03120581 | 4.94269885 |
| 3.82790052 | -1.1716082 | -0.1854536 |
| 4.37860773 | -3.8289672 | 0.51443006 |
| -1.1539806 | 3.1784815  | 2.92055964 |
| -3.233456  | 2.36574849 | 0.95801394 |

## EQ5

|             |             |             |
|-------------|-------------|-------------|
| -1.93477781 | 0.71703352  | 0.70297148  |
| 1.61166426  | 0.04819368  | 3.03987864  |
| 0.92194142  | -0.86360235 | 5.57009758  |
| 2.40511921  | 1.14407407  | -0.03943149 |
| 4.63982796  | -0.54667615 | -0.23866928 |
| -0.19086207 | 3.06184144  | 0.22675819  |
| 1.54708702  | 5.43913580  | -0.26160512 |

## EQ6

|            |            |            |
|------------|------------|------------|
| 1.7181179  | -2.595928  | 0.92031638 |
| -0.3330126 | -0.5743203 | 1.65509928 |
| -2.4701313 | 1.34865849 | 2.40949858 |
| 4.24283271 | -0.7811231 | 0.26958055 |
| 6.53452754 | 0.78771792 | -0.3253328 |
| -0.9830742 | 4.14307269 | 2.14462818 |
| 0.29073996 | 6.67192235 | 1.92620985 |

## EQ7

|            |            |            |
|------------|------------|------------|
| -2.4818205 | 1.81593841 | 2.74255481 |
| 1.58809412 | -0.0222066 | 2.24881002 |
| 0.12403811 | -1.3865918 | 4.13641605 |
| 3.51611427 | 1.79415773 | -0.2386353 |
| 5.55556071 | -0.0877898 | 0.54922188 |
| -0.7600364 | 2.97481669 | 0.78948159 |
| 1.45804912 | 3.91167599 | -1.2278488 |

EQ8

|            |            |            |
|------------|------------|------------|
| 3.03306791 | 1.83971294 | 0.0185169  |
| 0.53268645 | -0.092814  | 2.94675778 |
| -2.1585251 | 0.46094105 | 3.51456777 |
| 3.6334322  | -0.1929577 | 1.76551728 |
| 6.91501806 | 0.38753568 | -0.1617658 |
| -0.1680968 | 2.84364303 | 0.36158875 |
| -2.7875863 | 3.75393925 | 0.55481653 |

EQ9

|            |            |            |
|------------|------------|------------|
| 4.29482422 | 2.38308998 | -0.406133  |
| 2.02058405 | 2.82937398 | 1.24508201 |
| -0.6564249 | 5.43253383 | 3.79543509 |
| 2.99687956 | -0.7794021 | -0.4622344 |
| 1.57782905 | -3.1461193 | -0.2042424 |
| -0.6336504 | 2.56057026 | 2.94188325 |
| -0.6000409 | -0.2800469 | 2.09020873 |

## 2. $\Delta\Delta G^{\text{sol}}$ of $\text{I}_7^-$ of each structure in each phase.

Table S1.  $\Delta\Delta G^{\text{sol}}$  of  $\text{I}_7^-$  of each structure in each phase (unit: kcal/mol).

|     | Gas phase         | Acetonitrile      |
|-----|-------------------|-------------------|
| EQ0 | 0.00 <sup>a</sup> | -0.69             |
| EQ1 | 2.75              | 1.77              |
| EQ2 | 0.72              | 0.00 <sup>b</sup> |
| EQ3 | 7.32              | 6.19              |
| EQ4 | 8.77              | 6.88              |
| EQ5 | 8.72              | 6.85              |
| EQ6 | –                 | 0.15              |
| EQ7 | –                 | 0.65              |
| EQ8 | –                 | 27.60             |
| EQ9 | –                 | 5.60              |

a: Free energy is  $-2064.00527$  hartree.

b: Free energy is  $-2064.03400$  hartree.
